# Supplementary material for: Coordinate Modulation of Glycolytic Enzymes and OXPHOS by Imatinib in BCR-ABL Driven Chronic Myelogenous Leukemia Cells
Source: PubMed Central journal article supplement (PMC6651622; doi:10.3390/ijms20133134), 2019-06-27
Supplement: ijms-20-03134-s001.pdf [file ijms-20-03134-s001.pdf]

Supplementary Figure

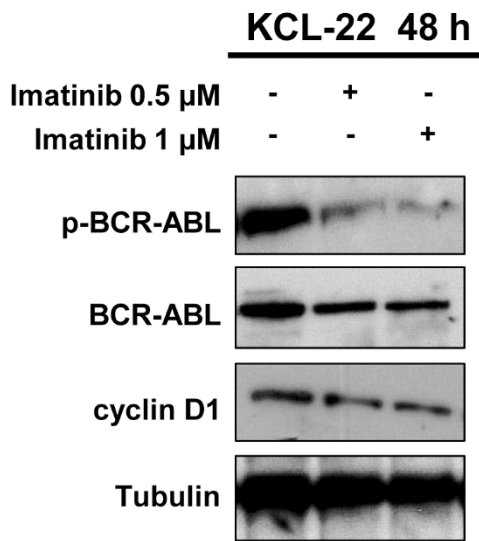

**Figure S1.** Levels of p-BCR-ABL, BCR-ABL and cyclin D1 in response to imatinib. Representative western blot analyses in whole cell lysates of KCL-22 cells exposed to imatinib for 48h

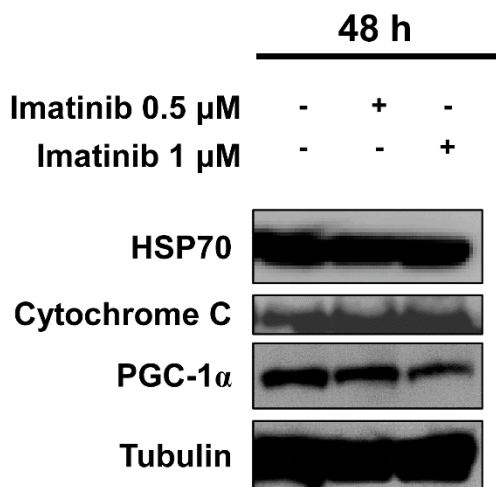

**Figure S2.** Levels of HSP70, cytochrome c and PGC-1 $\alpha$  in response to imatinib. Representative western blot analyses in whole cell lysates of K562 cells exposed to imatinib for 48h
